# Supplementary material for: Platform selection of engineered nanomaterials for water decontamination applications
Source: Royal Society of Chemistry journal article supplement (doi:10.1039/d0en00786b), 2020-01-01
Supplement: d0en00786b1.pdf [file d0en00786b1.pdf]

## Supporting Information

### Platform Selection of Engineered Nanomaterials for Water Decontamination Applications

Alina Borovik<sup>1</sup>, Vasiliki Karanikola<sup>2</sup>, Ines zucker<sup>1,3\*</sup>

<sup>1</sup>Porter School of Environmental Studies, Faculty of Exact Sciences, Tel Aviv University, Tel Aviv 69978, Israel

<sup>2</sup>Department of Chemical and Environmental Engineering, University of Arizona, Tucson, AZ 85721, USA

<sup>3</sup>School of Mechanical Engineering, Faculty of Engineering, Tel Aviv University, Tel Aviv 69978, Israel

\*Corresponding author: Address: Tel Aviv University, Tel Aviv 69978, Israel; Tel: +972-73-3804581; email: ineszucker@tauex.tau.ac.il

Search terms for Figure 1:

NM:

(TITLE-ABS-KEY ( nanomaterial OR nano AND material OR nanoparticle OR nano AND particle ) AND TITLE-ABS-KEY ( water AND remediation OR decontamination OR water AND treatment OR water OR decontamination ) )

NM@S:

(TITLE-ABS-KEY(nanomaterial OR nano material OR nanoparticle OR nano particle) AND TITLE-ABS-KEY(Water Remediation OR decontamination OR water treatment OR water OR decontamination)AND TITLE-ABS-KEY(embedded OR infused OR incorporated OR affixed OR impregnated OR immobilized OR modified OR functionalized))

**Table S1.** Literature used for evaluation of the efficiency criterion for selected supports for metal oxide nanoadsorbents. The table summarizes the calculations and assumptions taken into account when adsorption performance of the supported nanomaterial (NM@S) was normalized to the performance of the nanomaterial in suspended form (NM).

| Article                                                                                                                                                                                                                                 | Platform group               | Nanoadsorbent (NM)                       | Adsorbate | Nanoadsorbent performance (NM)                         | Nanoadsorbent performance on substrate (NM@S)               | NM@S/NM | Assumptions                                                                                                                                          |
|-----------------------------------------------------------------------------------------------------------------------------------------------------------------------------------------------------------------------------------------|------------------------------|------------------------------------------|-----------|--------------------------------------------------------|-------------------------------------------------------------|---------|------------------------------------------------------------------------------------------------------------------------------------------------------|
| O. Thirunavukkarasu, Arsenic removal from drinking water using iron oxide-coated sand, 2003, Water, Air, and Soil Pollution <sup>1</sup>                                                                                                | Natural media<br>Bead - Sand | $\alpha$ -FeOOH                          | As (III)  | 23 mg/g FeOOH <sup>2</sup>                             | 41.1ug/gNM@S/45mgFe/gNM@S*65Fe/100FeO(OH)=0.59mgAs/g FeOOH  | 0.026   | Iron oxide content 45 mg/g (4.5%)<br>pH 7.6<br>phase: combination of goethite and hematite                                                           |
|                                                                                                                                                                                                                                         |                              |                                          | As(V)     | 1.14 mg/g FeOOH <sup>3</sup>                           | 42.6ug/gNM@S/45mgFe/gNM@S*65Fe/100FeO(OH)=0.615mgAs/g FeOOH | 0.539   |                                                                                                                                                      |
| S.Lee, Iron oxide nano-particles-immobilized-sand material in the treatment of Cu(II), Cd(II) and Pb(II) contaminated waste waters, 2012, Chemical Engineering Journal <sup>4</sup>                                                     | Natural media<br>Bead - Sand | Iron oxide                               | Cd(II)    | 7.4 mg/g Iron oxide <sup>5</sup>                       | 0.5282/5.7*0.65*1000=60.23 mg/g Iron oxide                  | 8.139   | pH 4 and not 5 as in the NM@S paper                                                                                                                  |
|                                                                                                                                                                                                                                         |                              |                                          | Pb(II)    | 22.83 mg/g Iron oxide <sup>5</sup>                     | 2.0877/5.7*0.65*1000=238.07 mg/g Iron oxide                 | 10.43   |                                                                                                                                                      |
| S. Kundu, Adsorptive removal of As(III) from aqueous solution using iron oxide coated cement (IOCC): Evaluation of kinetic, equilibrium and thermodynamic models Sanghamitra, 2006, Separation and Purification Technology <sup>6</sup> | Natural media -<br>Cement    | Fe <sub>3</sub> O <sub>4</sub>           | As(III)   | 2.63 mg/g Fe <sub>3</sub> O <sub>4</sub> <sup>3</sup>  | 0.69*0.2353=0.16 mg/g Fe <sub>3</sub> O <sub>4</sub>        | 0.061   |                                                                                                                                                      |
|                                                                                                                                                                                                                                         |                              | Fe <sub>3</sub> O <sub>4</sub>           | As(V)     | 2.63 mg/g Fe <sub>3</sub> O <sub>4</sub> <sup>3</sup>  | 3.86*0.025*231/55.8=0.4 mg/g Fe <sub>3</sub> O <sub>4</sub> | 0.152   |                                                                                                                                                      |
| A. Yurum, Fast deposition of porous iron oxide on activated carbon by microwave heating and arsenic (V) removal from water, 2014, Chemical Engineering Journal <sup>7</sup>                                                             | Granular activated carbon    | $\alpha$ -Fe <sub>2</sub> O <sub>3</sub> | As(V)     | 0.827 mg/g Fe <sub>2</sub> O <sub>3</sub> <sup>8</sup> | 136.37 mg/g Fe <sub>2</sub> O <sub>3</sub>                  | 164.897 | Took the oxidized activated carbon. WT%(Fe)=20.37%<br><u>Assumption:</u> Same pH range (pH=6.27 for N <sub>ads</sub> -S, pH=7 for N <sub>ads</sub> ) |
| A.M. Cooper, The effect of carbon type on arsenic and trichloroethylene removal capabilities of iron (hydr)oxide nanoparticle-impregnated granulated activated carbons, 2010, Journal of Hazardous Materials <sup>9</sup>               | Granular activated carbon    | $\delta$ -FeOOH                          | As(V)     | 7 mg/g $\delta$ -FeOOH <sup>10</sup>                   | 45.1 mg/g FeOOH                                             | 6.443   | <u>Assumption:</u><br>The same N <sub>ads</sub> phase in both articles<br>The same condition used to measure the adsorption capacity.                |

|                                                                                                                                                                                                                                                                                                                       |                           |                                          |         |                                                                                 |                                                             |         |                                                                                                                                                                                                                                                                                                                                                             |
|-----------------------------------------------------------------------------------------------------------------------------------------------------------------------------------------------------------------------------------------------------------------------------------------------------------------------|---------------------------|------------------------------------------|---------|---------------------------------------------------------------------------------|-------------------------------------------------------------|---------|-------------------------------------------------------------------------------------------------------------------------------------------------------------------------------------------------------------------------------------------------------------------------------------------------------------------------------------------------------------|
| K. Hristovski, Effect of synthesis conditions on nano-iron (hydr)oxide impregnated granulated activated carbon, 2009, Chemical Engineering Journal <sup>11</sup>                                                                                                                                                      | Granular activated carbon | Amorphous FeOOH                          | As(V)   | 7 mg/g Amorphous FeOOH <sup>12</sup>                                            | 21.7 mg/g Amorphous FeOOH                                   | 3.100   | Assumption:<br>Adsorption capacity:<br>the average amount of adsorption capacity (15.2-28.2 mg/g amorphous FeOOH)                                                                                                                                                                                                                                           |
| M. Jain, Development of iron oxide/activated carbon nanoparticle composite for the removal of Cr(VI), Cu(II) and Cd(II) ions from aqueous solution, 2018, Water Resources and Industry <sup>13</sup>                                                                                                                  | Activated carbon          | Fe <sub>3</sub> O <sub>4</sub> magnetite | Cr(IV)  | 5.5 mg/g Fe <sub>3</sub> O <sub>4</sub>                                         | 8.06/0.184*0.72 = 31.54 mg/g Fe <sub>3</sub> O <sub>4</sub> | 5.727   | Phase: magnetite                                                                                                                                                                                                                                                                                                                                            |
|                                                                                                                                                                                                                                                                                                                       |                           |                                          | Cu(II)  | 2.7 mg/g Fe <sub>3</sub> O <sub>4</sub>                                         | 3.2/0.184*0.72 = 12.52 mg/g Fe <sub>3</sub> O <sub>4</sub>  | 4.637   |                                                                                                                                                                                                                                                                                                                                                             |
|                                                                                                                                                                                                                                                                                                                       |                           |                                          | Cd(II)  | 0.09 mg/g Fe <sub>3</sub> O <sub>4</sub>                                        | 2.15/0.184*0.72 = 8.41 mg/g Fe <sub>3</sub> O <sub>4</sub>  | 93.444  |                                                                                                                                                                                                                                                                                                                                                             |
| D. Mohan, Cadmium and lead remediation using magnetic oak wood and oak bark fast pyrolysis bio-chars, 2014, Chemical Engineering Journal <sup>14</sup>                                                                                                                                                                | Carbon biochar            | Fe <sub>3</sub> O <sub>4</sub> magnetite | Cd(II)  | 0.09 mg/g Fe <sub>3</sub> O <sub>4</sub> <sup>13</sup>                          | 7.4/0.513*0.72 = 10.39 mg/g Fe <sub>3</sub> O <sub>4</sub>  | 115.444 | pH=5                                                                                                                                                                                                                                                                                                                                                        |
|                                                                                                                                                                                                                                                                                                                       |                           |                                          | Cd(II)  | 0.09 mg/g Fe <sub>3</sub> O <sub>4</sub> <sup>13</sup>                          | 2.87/0.806*0.72 = 2.56 mg/g Fe <sub>3</sub> O <sub>4</sub>  | 28.444  |                                                                                                                                                                                                                                                                                                                                                             |
|                                                                                                                                                                                                                                                                                                                       |                           |                                          | Pb(II)  | 22.89 mg/g Fe <sub>3</sub> O <sub>4</sub> <sup>15</sup>                         | 30.2/0.513*0.72 = 42.39 mg/g Fe <sub>3</sub> O <sub>4</sub> | 1.852   |                                                                                                                                                                                                                                                                                                                                                             |
|                                                                                                                                                                                                                                                                                                                       |                           |                                          | Pb(II)  | 0.1105 mmol/g * 207.2 = 22.89 mg/g Fe <sub>3</sub> O <sub>4</sub> <sup>15</sup> | 10.13/0.806*0.72 = 9.05 mg/g Fe <sub>3</sub> O <sub>4</sub> | 0.395   |                                                                                                                                                                                                                                                                                                                                                             |
| S.M, Miller, Novel, bio-based, photoactive arsenic sorbent: TiO <sub>2</sub> -impregnated chitosan bead, 2010, Water Research<br>P.A. Nishad, Enhancing the antimony sorption properties of nano titania -chitosan beads using epichlorohydrin as the crosslinker, 2017, Journal of Hazardous Materials <sup>16</sup> | Chitosan beads            | TiO <sub>2</sub>                         | As(III) | 3 mg/g TiO <sub>2</sub>                                                         | 2.099/0.298 = 7.04 mg/g TiO <sub>2</sub>                    | 2.347   | Data for NM is taken from fig. 4 in article, so we assume the experiment conditions are the same as for the NM@S.<br>In article mentioned that TiO <sub>2</sub> mass is 29.8%.<br>Assumption:<br>pH is similar (pH=3.3 for N <sub>ads</sub> and pH=4.3 for NM@S).<br>Same NM used. <sup>17</sup><br>The ration between N <sub>ads</sub> to S is given (1:5) |
|                                                                                                                                                                                                                                                                                                                       |                           |                                          | As (V)  | 5.5 mg/g TiO <sub>2</sub>                                                       | 2.050/0.298 = 6.88 mg/g TiO <sub>2</sub>                    | 1.251   |                                                                                                                                                                                                                                                                                                                                                             |
| P.A. Nishad, Nano-titania-crosslinked chitosan composite as a superior sorbent for antimony (III) and (V), 2014, Carbohydrate                                                                                                                                                                                         | Chitosan beads            | TiO <sub>2</sub>                         | Sb(III) | 173.2 μmol/g TiO <sub>2</sub>                                                   | 170.3 / 6 = 1021.8 μmol/g TiO <sub>2</sub>                  | 5.9     | pH=6.9<br>NM to S ration is 1:5                                                                                                                                                                                                                                                                                                                             |
|                                                                                                                                                                                                                                                                                                                       |                           |                                          | Sv(III) | 187.7 μmol/g TiO <sub>2</sub>                                                   | 1089 μmol/g TiO <sub>2</sub>                                | 5.802   | pH=3.06                                                                                                                                                                                                                                                                                                                                                     |

|                                                                                                                                                                                                                                                         |                    |                                       |                    |                                                     |                                                                        |       |                                                                                                                            |
|---------------------------------------------------------------------------------------------------------------------------------------------------------------------------------------------------------------------------------------------------------|--------------------|---------------------------------------|--------------------|-----------------------------------------------------|------------------------------------------------------------------------|-------|----------------------------------------------------------------------------------------------------------------------------|
| Polymers <sup>17</sup>                                                                                                                                                                                                                                  |                    |                                       | Sb(V)              | 799.1 $\mu\text{mol/g TiO}_2$                       | 1215 $\mu\text{mol/g TiO}_2$                                           | 1.519 | pH=3.33                                                                                                                    |
| J. Yamani, Enhanced arsenic removal using mixed metal oxide impregnated chitosan beads, 2012, Water Research <sup>18</sup>                                                                                                                              | Chitosan beads     | $\text{Al}_2\text{O}_3$               | As(V)              | 12 mg/g $\text{Al}_2\text{O}_3$                     | 8.4 mg/g $\text{Al}_2\text{O}_3$                                       | 0.7   |                                                                                                                            |
| A. I. Zouboulis, Arsenic Removal Using Iron Oxide Loaded Alginate Beads, 2002, Industrial and Engineering Chemistry Research <sup>19</sup>                                                                                                              | Alginate beads     | Hydrous $\text{FeO(OH)}$              | As(V)              | 9 mg As / g-Fe <sup>20</sup>                        | 5.79 mg As / g-Fe                                                      | 0.643 | Assumption: Same $N_{\text{ads}}$ phase and experiment conditions.                                                         |
| J. Min, Removal of Selenite and Chromate Using Iron(III)-Doped Alginate Gels, 1999, Water Environment Research <sup>21</sup>                                                                                                                            | Alginate gel beads | Iron oxyhydroxide $\text{Fe(OH)}_3$   | Se(IV)             | 2.4 mg / g-Fe <sup>22</sup>                         | 0.15 g Se(IV) / g-Fe                                                   | 0.062 |                                                                                                                            |
| W. Biftu, Synthesis of nano $\text{ZrO}_2$ via simple new green routes and its effective application as adsorbent in phosphate remediation of water with or without immobilization in Al-alginate beads, 2020, Water Science & Technology <sup>23</sup> | Al-alginate beads  | n $\text{ZrO}_2$                      | $\text{PO}_4^{3-}$ | 126.2 mg/g - n $\text{ZrO}_2$                       | 173.0 mg/g n $\text{ZrO}_2$ -Al-alginate = 24.22 mg/g n $\text{ZrO}_2$ | 0.192 | 1.5 g of nano $\text{ZrO}_2$ was added => $1.5/173 = 86 \Rightarrow 86\%$ Al-alginate beads and 14% NM                     |
| R. Pineda, Removal of Arsenic from Aqueous Solutions with Alginate Based-Magnetic Nanocomposites, 2009, Clean Technology <sup>24</sup>                                                                                                                  | Alginate           | Magnetite ( $\text{Fe}_3\text{O}_4$ ) | As(V)              | 11-17 mg/g $\text{Fe}_3\text{O}_4$ <sup>25,26</sup> | 1.1 mg/g                                                               | 0.418 | Assumption: Same $N_{\text{ads}}$ phase and experiment conditions. For NM@S/NM calculation we took the NM average          |
|                                                                                                                                                                                                                                                         |                    |                                       | As(III)            | 20-22 mg/g $\text{Fe}_3\text{O}_4$ <sup>25,26</sup> | 1.04 mg/g                                                              | 0.495 | Assumption: Same $N_{\text{ads}}$ phase and experiment conditions. For NM@S/NM calculation we took the NM average          |
| J. Elton, Titanium Dioxide-Based Hybrid Ion-Exchange Media for Simultaneous Removal of Arsenic and Nitrate, 2013, Novel Solutions to Water Pollution <sup>27</sup>                                                                                      | Ion-Exchange beads | $\text{TiO}_2$                        | As                 | 7 mg/g $\text{TiO}_2$ <sup>28</sup>                 | —<br>9.95 mg/g $\text{TiO}_2$                                          | 1.421 | MW(Ti)=47.8 g/mol<br>MW( $\text{TiO}_2$ )=79.8 g/mol<br>Assumption: Same $N_{\text{ads}}$ phase and experiment conditions. |

|                                                                                                                                                                                             |                    |                               |    |                                  |                                                 |       |                                                                                                                                                                                                                                                                                                   |
|---------------------------------------------------------------------------------------------------------------------------------------------------------------------------------------------|--------------------|-------------------------------|----|----------------------------------|-------------------------------------------------|-------|---------------------------------------------------------------------------------------------------------------------------------------------------------------------------------------------------------------------------------------------------------------------------------------------------|
|                                                                                                                                                                                             |                    |                               |    |                                  | —<br>14.92 mg/g TiO <sub>2</sub>                | 2.131 | MW(Ti)=47.8 g/mol<br>MW(TiO <sub>2</sub> )=79.8 g/mol<br>Assumption:<br>Same N <sub>ads</sub> phase and<br>experiment<br>conditions.                                                                                                                                                              |
|                                                                                                                                                                                             |                    |                               |    |                                  | —<br>16.36 mg/g TiO <sub>2</sub>                | 2.336 | MW(Ti)=47.8 g/mol<br>MW(TiO <sub>2</sub> )=79.8 g/mol<br>Assumption:<br>Same N <sub>ads</sub> phase and<br>experiment<br>conditions.                                                                                                                                                              |
| M. Gifford, Ranking traditional and nano-enabled sorbents for simultaneous removal of arsenic and chromium from simulated groundwater, 2017, Science of the Total Environment <sup>29</sup> | Ion-Exchange beads | TiO <sub>2</sub>              | As | 107.5 μmol/g TiO <sub>2</sub>    | 12.4/0.16 μmol/g = 77.5 μmol/g TiO <sub>2</sub> | 0.721 | From J. Elton et al. assuming mass of synthesized TiO <sub>2</sub> @S is 11-21% (16% avg) <sup>27</sup> .<br>From K. Hristovski et al. assuming that mass of amorphous iron (hydro)oxide synthesized is 16% of Fe <sup>30</sup> .<br>Mw(Fe) = 55.8 g/mol<br>Mw(Fe(OH) <sub>2</sub> ) = 89.8 g/mol |
|                                                                                                                                                                                             |                    |                               | Cr | 5.7 μmol/g Fe(OH) <sub>2</sub>   | —<br>—<br>Fe(OH) <sub>2</sub>                   | 8.246 |                                                                                                                                                                                                                                                                                                   |
|                                                                                                                                                                                             |                    | amorphous Fe(OH) <sub>2</sub> | As | 172.1 μmol/g Fe(OH) <sub>2</sub> | —<br>—<br>Fe(OH) <sub>2</sub>                   | 0.341 |                                                                                                                                                                                                                                                                                                   |

|                                                                                                                                                                                                                |                    |                                |                               |                                                       |                                                                           |       |                                                                                                                                                                        |
|----------------------------------------------------------------------------------------------------------------------------------------------------------------------------------------------------------------|--------------------|--------------------------------|-------------------------------|-------------------------------------------------------|---------------------------------------------------------------------------|-------|------------------------------------------------------------------------------------------------------------------------------------------------------------------------|
|                                                                                                                                                                                                                |                    |                                |                               |                                                       |                                                                           |       | of amorphous iron (hydro)oxide synthesized is 16% of Fe <sup>30</sup> .<br>Mw(Fe) = 55.8 g/mol<br>Mw(Fe(OH) <sub>2</sub> ) = 89.8 g/mol                                |
| J. Wang, Hydrous ferric oxide–resin nanocomposites of tunable structure for arsenite removal: Effect of the host pore structure, 2011, Journal of Hazardous Materials <sup>31</sup>                            | Ion-Exchange beads | Amorphous Fe(OH) <sub>2</sub>  | As(III)                       | 28.0 mg/g Fe(OH) <sub>2</sub> <sup>16</sup>           | 225*0.65=146.25 mg/g Fe(OH) <sub>2</sub>                                  | 4.223 |                                                                                                                                                                        |
|                                                                                                                                                                                                                |                    |                                |                               |                                                       | 200*0.65=130 mg/g Fe(OH) <sub>2</sub>                                     | 4.643 |                                                                                                                                                                        |
|                                                                                                                                                                                                                |                    |                                |                               |                                                       | 190*0.65=123.5 mg/g Fe(OH) <sub>2</sub>                                   | 4.411 |                                                                                                                                                                        |
|                                                                                                                                                                                                                |                    |                                |                               |                                                       | 200*0.65=130 mg/g Fe(OH) <sub>2</sub>                                     | 4.643 |                                                                                                                                                                        |
|                                                                                                                                                                                                                |                    |                                |                               |                                                       | 175*0.65=113.75 mg/g Fe(OH) <sub>2</sub>                                  | 4.063 |                                                                                                                                                                        |
| Q. Su, Fabrication of polymer-supported nanosized hydrous manganese dioxide (HMO) for enhanced lead removal from waters, 2009, Science of the Total Environment <sup>32</sup>                                  | Ion-Exchange beads | Mn(OH) <sub>2</sub>            | Pb(II)                        | 352.55 mg/g Mn(OH) <sub>2</sub>                       | 395 mg/g / (7.33%Mn*55/89Mn in MN(OH)2)= 3381.85 mg/g Mn(OH) <sub>2</sub> | 9.592 |                                                                                                                                                                        |
| L. Zhang, Removal of phosphate from water by activated carbon fiber loaded with lanthanum oxide, 2011, Journal of Hazardous Materials <sup>33</sup>                                                            | Carbon fibers      | LaO                            | PO <sub>4</sub> <sup>3-</sup> | 46.95 mg/g LaO <sup>34</sup>                          | 5.85/0.1178 = 49.66 mg/g LaO                                              | 1.058 | WT%(LaO)=11.78%<br>Assumption:<br>Same LaO phase and experiment condition                                                                                              |
| J. Zhang, Synthesis of magnetic iron oxide nanoparticles onto fluorinated carbon fabrics for contaminant removal and oil-water separation, 2017, Separation and Purification Technology <sup>35</sup>          | Carbon fibers      | Fe <sub>3</sub> O <sub>4</sub> | Cu(II)                        | 8.9 mg/g Fe <sub>3</sub> O <sub>4</sub> <sup>36</sup> | 62.5 mg/g Fe <sub>3</sub> O <sub>4</sub>                                  | 7.022 | pH=5                                                                                                                                                                   |
| Q. Zhou, Phosphorus removal from wastewater using nano-particulates of hydrated ferric oxide doped activated carbon fiber prepared by Sol–Gel method, 2012, Chemical Engineering Journal journal <sup>37</sup> | Carbon fibers      | FeOOH                          | P                             | 139.5 mg/g FeOOH <sup>38</sup>                        | 12.86/0.44=29.227 mg/g FeOOH                                              | 0.21  | From fig2 WT% (FeOOH)=44<br>12.86 mg/g-NM@S<br>12.86/0.44 = 29.227 mg/g FeOOH<br><br>pH range of 2.0–6.0<br><br>assume: amorphous phase, FeOOH<br>adsorption capacity: |

|                                                                                                                                                                                                                                      |                                           |                                          |        |                                            |                                                                                                                                                                                    |       |                                                                                                                                  |
|--------------------------------------------------------------------------------------------------------------------------------------------------------------------------------------------------------------------------------------|-------------------------------------------|------------------------------------------|--------|--------------------------------------------|------------------------------------------------------------------------------------------------------------------------------------------------------------------------------------|-------|----------------------------------------------------------------------------------------------------------------------------------|
|                                                                                                                                                                                                                                      |                                           |                                          |        |                                            |                                                                                                                                                                                    |       | 134-145 mg/g <sup>38</sup> , we took the average                                                                                 |
| Y. Zheng, Adsorptive removal of arsenic from aqueous solution by a PVDF/zirconia blend flat sheet membrane, 2011, Journal of Membrane Science <sup>39</sup>                                                                          | Carbon fibers                             | Zr(OH) <sub>4</sub>                      | As     | 38.9 mg/g Zr(OH) <sub>4</sub>              | 43 mg/g mg/g Zr(OH) <sub>4</sub>                                                                                                                                                   | 1.105 |                                                                                                                                  |
| K.E. Greenstein, Performance comparison of hematite (α-Fe <sub>2</sub> O <sub>3</sub> )-polymer composite and core-shell nanofibers as point-of-use filtration platforms for metal sequestration, 2019, Water Research <sup>40</sup> | Polymeric fibers                          | α-Fe <sub>2</sub> O <sub>3</sub>         | As(V)  | 17 mg/g α-Fe <sub>2</sub> O <sub>3</sub>   | 9.3 mg/g α-Fe <sub>2</sub> O <sub>3</sub>                                                                                                                                          | 0.547 |                                                                                                                                  |
|                                                                                                                                                                                                                                      |                                           |                                          | Cu(II) | 70 mg/g α-Fe <sub>2</sub> O <sub>3</sub>   | 35 mg/g α-Fe <sub>2</sub> O <sub>3</sub>                                                                                                                                           | 0.5   |                                                                                                                                  |
|                                                                                                                                                                                                                                      |                                           |                                          | Cr(VI) | 9.5 mg/g α-Fe <sub>2</sub> O <sub>3</sub>  | 7.3 mg/g α-Fe <sub>2</sub> O <sub>3</sub>                                                                                                                                          | 0.768 |                                                                                                                                  |
|                                                                                                                                                                                                                                      |                                           |                                          | Pb(II) | 94 mg/g α-Fe <sub>2</sub> O <sub>3</sub>   | 57 mg/g α-Fe <sub>2</sub> O <sub>3</sub>                                                                                                                                           | 0.606 |                                                                                                                                  |
| K.T. Peter, Functionalized polymer-iron oxide hybrid nanofibers: Electrospun filtration devices for metal oxyanion removal, 2017, Water Research <sup>41</sup>                                                                       | Polymeric fibers (polyacrylonitrile, PAN) | Ferrihydrite iron oxide                  | Cr     | 19 mg-Cr/g-Fh                              | 17 mg-Cr/g-Fh                                                                                                                                                                      | 0.89  |                                                                                                                                  |
|                                                                                                                                                                                                                                      |                                           |                                          | As     | 31 mg-As/g-Fh                              | 26 mg-As/g-Fh                                                                                                                                                                      | 0.84  |                                                                                                                                  |
| K.T. Peter, Surfactant-assisted fabrication of porous polymeric nanofibers with surface-enriched iron oxide nanoparticles: composite filtration materials for removal of metal cations, 2018, Environmental Science <sup>42</sup>    | Polymeric fibers (PAN)                    | Amorphous Fe <sub>2</sub> O <sub>3</sub> | Pb     | 13 mg-Pb/g-Fe <sub>2</sub> O <sub>3</sub>  | 27 mg-Pb/g-Fe <sub>2</sub> O <sub>3</sub>                                                                                                                                          | 2.08  |                                                                                                                                  |
|                                                                                                                                                                                                                                      |                                           |                                          | Cu     | 75 mg-Cu/g-Fe <sub>2</sub> O <sub>3</sub>  | 25 mg-Cu/g-Fe <sub>2</sub> O <sub>3</sub>                                                                                                                                          | 0.33  |                                                                                                                                  |
|                                                                                                                                                                                                                                      |                                           |                                          | Cd     | 105 mg-Cd/g-Fe <sub>2</sub> O <sub>3</sub> | 100 mg-Cd/g-Fe <sub>2</sub> O <sub>3</sub>                                                                                                                                         | 0.95  |                                                                                                                                  |
|                                                                                                                                                                                                                                      | Polymeric fibers (PAN-based)              | Amorphous Fe <sub>2</sub> O <sub>3</sub> | Pb     | 13 mg-Pb/g-Fe <sub>2</sub> O <sub>3</sub>  | 101 mg-Pb/g-Fe <sub>2</sub> O <sub>3</sub>                                                                                                                                         | 7.77  |                                                                                                                                  |
|                                                                                                                                                                                                                                      |                                           |                                          | Cu     | 75 mg-Cu/g-Fe <sub>2</sub> O <sub>3</sub>  | 170 mg-Cu/g-Fe <sub>2</sub> O <sub>3</sub>                                                                                                                                         | 2.27  |                                                                                                                                  |
|                                                                                                                                                                                                                                      |                                           |                                          | Cd     | 105 mg-Cd/g-Fe <sub>2</sub> O <sub>3</sub> | 57 mg-Cd/g-Fe <sub>2</sub> O <sub>3</sub>                                                                                                                                          | 0.54  |                                                                                                                                  |
| X.Zhang, Preparation, performance and adsorption activity of TiO <sub>2</sub> nanoparticles entrapped PVDF hybrid membranes, 2012, Applied Surface Science <sup>43</sup>                                                             | PVDF membrane                             | TiO <sub>2</sub>                         | Cu(II) | 6.86 mg/g TiO <sub>2</sub> <sup>44</sup>   | 86 ug/cm <sup>2</sup> / (1.087*1.78)g/cm <sup>3</sup> density of pVDF and added weight by TiO <sub>2</sub> / 0.1 cm thick mem / 8.76% TiO <sub>2</sub> = 0.5 mg/g TiO <sub>2</sub> | 0.073 | 8.74% loaded TiO <sub>2</sub> 20mm×20mm membrane area (4cm <sup>2</sup> ) pH>7 (for pH>7 adsorption is the same) Lagergren model |
| B. Gohari, Polyethersulfone Membranes Prepared with 3-Aminopropyltriethoxysilane Modified Alumina Nanoparticles for Cu(II) Removal from Water, 2018, ACS OMEGA <sup>45</sup>                                                         | PES membrane                              | γ-alumina                                | Cu(II) | 51.3 mg/g                                  | $\frac{44.84 \frac{mg}{g}}{0.05} = 896.8 \text{ mg/g}$                                                                                                                             | 17.48 | 5% alumina                                                                                                                       |
| X. Zhang, Preparation, performances of PVDF/ZnO hybrid                                                                                                                                                                               | PVDF membrane                             | hexagonal ZnO                            | Cu(II) | 54.3 mg/g <sup>47</sup>                    | 87.5 ug/cm <sup>2</sup> / (1.05*1.78)g/cm <sup>3</sup> density of pVDF and added                                                                                                   | 0.172 |                                                                                                                                  |



|                                                                                                                                                                                                         |               |                     |                 |               |                                                           |       |  |
|---------------------------------------------------------------------------------------------------------------------------------------------------------------------------------------------------------|---------------|---------------------|-----------------|---------------|-----------------------------------------------------------|-------|--|
| membranes and their applications in the removal of copper ions, 2014, Applied Surface Science <sup>46</sup>                                                                                             |               |                     |                 |               | weight by ZnO / 0.1 cm thick mem / 5% ZnO = 9.35 mg/g ZnO |       |  |
| L. Chen, In situ formation of La(OH) <sub>3</sub> -poly(vinylidene fluoride) composite filtration membrane with superior phosphate removal properties, 2018, Chemical Engineering Journal <sup>48</sup> | PVDF membrane | La(OH) <sub>3</sub> | PO <sub>4</sub> | 61.7 mg /g-La | 256.6 mg/g-La                                             | 4.159 |  |

## REFERENCES

1. Thirunavukkarasu, O. S., Viraraghavan, T. & Subramanian, K. S. Arsenic removal from drinking water using iron oxide-coated sand. *Water. Air. Soil Pollut.* **142**, 95–111 (2003).
2. Wilkie, J. A. & Hering, J. G. Adsorption of arsenic onto hydrous ferric oxide: effects of adsorbate/adsorbent ratios and co-occurring solutes. *Colloids Surfaces A Physicochem. Eng. Asp.* **107**, 97–110 (1996).
3. Mamindy-Pajany, Y., Hurel, C., Marmier, N. & Roméo, M. Arsenic (V) adsorption from aqueous solution onto goethite, hematite, magnetite and zero-valent iron: Effects of pH, concentration and reversibility. *Desalination* **281**, 93–99 (2011).
4. Lee, S. M., Laldawngliana, C. & Tiwari, D. Iron oxide nano-particles-immobilized-sand material in the treatment of Cu(II), Cd(II) and Pb(II) contaminated waste waters. *Chem. Eng. J.* **195–196**, 103–111 (2012).
5. Zhang, C. *et al.* Phase transformation of crystalline iron oxides and their adsorption abilities for Pb and Cd. *Chem. Eng. J.* **284**, 247–259 (2016).
6. Kundu, S. & Gupta, A. K. Adsorptive removal of As(III) from aqueous solution using iron oxide coated cement (IOCC): Evaluation of kinetic, equilibrium and thermodynamic models. *Sep. Purif. Technol.* **51**, 165–172 (2006).
7. Yürüm, A. *et al.* Fast deposition of porous iron oxide on activated carbon by microwave heating and arsenic ( V ) removal from water. *Chem. Eng. J.* **242**, 321–332 (2014).
8. Giménez, J., Martínez, M., de Pablo, J., Rovira, M. & Duro, L. Arsenic sorption onto natural hematite, magnetite, and goethite. *J. Hazard. Mater.* **141**, 575–580 (2007).
9. Anne Marie Cooper, Kiril D. Hristovski, Teresia Möller, Paul Westerhoff, P. S. The effect of carbon type on arsenic and trichloroethylene removal capabilities of iron (hydr)oxide nanoparticle-impregnated granulated activated carbons. *J. Hazard. Mater.* **183**, 381–388 (2010).
10. Faria, M. C. S. *et al.* Arsenic removal from contaminated water by ultrafine  $\delta$ -FeOOH adsorbents. *Chem. Eng. J.* **237**, 47–54 (2014).
11. Hristovski, K. D., Westerhoff, P. K., Möller, T. & Sylvester, P. Effect of synthesis conditions on nano-iron (hydr)oxide impregnated granulated activated carbon. *Chem. Eng. J.* **146**, 237–243 (2009).
12. Lenoble, V., Bouras, O., Deluchat, V., Serpaud, B. & Bollinger, J. C. Arsenic adsorption onto pillared clays and iron oxides. *J. Colloid Interface Sci.* **255**, 52–58 (2002).
13. Jain, M. *et al.* Development of iron oxide/activated carbon nanoparticle composite for the removal of Cr(VI), Cu(II) and Cd(II) ions from aqueous solution. *Water Resour. Ind.* **20**, 54–74 (2018).
14. Mohan, D., Kumar, H., Sarswat, A., Alexandre-Franco, M. & Pittman, C. U. Cadmium and lead remediation using magnetic oak wood and oak bark fast pyrolysis bio-chars. *Chem. Eng. J.* **236**, 513–528 (2014).
15. Wang, X. S., Lu, H. J., Zhu, L., Liu, F. & Ren, J. J. Adsorption of lead(II) ions onto magnetite nanoparticles. *Adsorpt. Sci. Technol.* **28**, 407–417 (2010).

16. Miller, S. M. & Zimmerman, J. B. Novel, bio-based, photoactive arsenic sorbent: TiO<sub>2</sub>-impregnated chitosan bead. *Water Res.* **44**, 5722–5729 (2010).
17. Nishad, P. A., Bhaskarapillai, A. & Velmurugan, S. Nano-titania-crosslinked chitosan composite as a superior sorbent for antimony (III) and (V). *Carbohydr. Polym.* **108**, 169–175 (2014).
18. Yamani, J. S., Miller, S. M., Spaulding, M. L. & Zimmerman, J. B. Enhanced arsenic removal using mixed metal oxide impregnated chitosan beads. *Water Res.* **46**, 4427–4434 (2012).
19. Zouboulis, A. I. & Katsoyiannis, I. A. Arsenic removal using iron oxide loaded alginate beads. *Ind. Eng. Chem. Res.* **41**, 6149–6155 (2002).
20. Jennifer A. Wilkie, J. G. H. *et al.* Adsorption of arsenic onto hydrous ferric oxide: effects of adsorbate/adsorbent ratios and co-occurring solutes. *Colloids and Surfaces* **107**, 97–110 (1996).
21. Min, J. H. & Hering, J. G. Removal of Selenite and Chromate Using Iron(III)-Doped Alginate Gels. *Water Environ. Res.* **71**, 169–175 (1999).
22. Gonzalez, C. M. *et al.* Sorption kinetic study of selenite and selenate onto a high and low pressure aged iron oxide nanomaterial. *J. Hazard. Mater.* **211–212**, 138–145 (2012).
23. Biftu, W. K. & Ravindhranath, K. Synthesis of nanoZrO<sub>2</sub> via simple new green routes and its effective application as adsorbent in phosphate remediation of water with or without immobilization in Al-alginate beads. *Water Sci. Technol.* **81**, 2617–2633 (2020).
24. Pineda, T., L., Rivera, M., O., Pérez, O., P., & Velázquez, F., R. Removal of Arsenic from Aqueous Solutions with Alginate Based-Magnetic Nanocomposites. *Clean Technol.* **2**, 261–264 (2009).
25. He, K. O., Agai, Y. T., Akamura, S. N., Shima, T. O. & Aba, Y. B. Adsorption Behavior of Arsenic ( III ) and Arsenic ( V ) Using Magnetite. *J. Chem. Eng. Japan* **38**, 671–676 (2005).
26. Yean, S. & Cong, L. Effect of magnetite particle size on adsorption and desorption of arsenite and arsenate. *Mater. Res. Soc.* 3255–3264 (2005) doi:10.1557/JMR.2005.0403.
27. Elton, J., Hristovski, K. & Westerhoff, P. Titanium dioxide-based hybrid ion-exchange media for simultaneous removal of arsenic and nitrate. *ACS Symp. Ser.* **1123**, 223–236 (2013).
28. Hristovski, K., Baumgardner, A. & Westerhoff, P. Selecting metal oxide nanomaterials for arsenic removal in fixed bed columns: From nanopowders to aggregated nanoparticle media. *J. Hazard. Mater.* **147**, 265–274 (2007).
29. Gifford, M., Hristovski, K. & Westerhoff, P. Ranking traditional and nano-enabled sorbents for simultaneous removal of arsenic and chromium from simulated groundwater. *Sci. Total Environ.* **601–602**, 1008–1014 (2017).
30. Hristovski, K. *et al.* Simultaneous removal of perchlorate and arsenate by ion-exchange media modified with nanostructured iron (hydr)oxide. *J. Hazard. Mater.* **152**, 397–406 (2008).
31. Wang, J., Zhang, S., Pan, B., Zhang, W. & Lv, L. Hydrous ferric oxide–resin

- nanocomposites of tunable structure for arsenite removal: Effect of the host pore structure. *J. Hazard. Mater.* **198**, 241–246 (2011).
32. Su, Q. *et al.* Fabrication of polymer-supported nanosized hydrous manganese dioxide (HMO) for enhanced lead removal from waters. *Sci. Total Environ.* **407**, 5471–5477 (2009).
  33. Zhang, L. *et al.* Removal of phosphate from water by activated carbon fiber loaded with lanthanum oxide. *J. Hazard. Mater. J.* **190**, 848–855 (2011).
  34. Xie, J., Lin, Y., Li, C., Wu, D. & Kong, H. Removal and recovery of phosphate from water by activated aluminum oxide and lanthanum oxide. *Powder Technol.* **269**, 351–357 (2015).
  35. Zhang, J. *et al.* Synthesis of magnetic iron oxide nanoparticles onto fluorinated carbon fabrics for contaminant removal and oil-water separation. *Sep. Purif. Technol.* **174**, 312–319 (2017).
  36. Wang, X. S., Zhu, L. & Lu, H. J. Surface chemical properties and adsorption of Cu (II) on nanoscale magnetite in aqueous solutions. *Desalination* **276**, 154–160 (2011).
  37. Zhou, Q., Wang, X., Liu, J. & Zhang, L. Phosphorus removal from wastewater using nano-particulates of hydrated ferric oxide doped activated carbon fiber prepared by Sol – Gel method. *Chem. Eng. J. J.* **202–202**, 619–626 (2012).
  38. Newcombe, R. L., Strawn, D. G., Grant, T. M., Childers, S. E. & Möller, G. Phosphorus Removal from Municipal Wastewater by Hydrous Ferric Oxide Reactive Filtration and Coupled Chemically Enhanced Secondary Treatment: Part II-Mechanism. *Water Environ. Res.* **80**, 248–256 (2008).
  39. Zheng, Y. M., Zou, S. W., Nanayakkara, K. G. N., Matsuura, T. & Chen, J. P. Adsorptive removal of arsenic from aqueous solution by a PVDF/zirconia blend flat sheet membrane. *J. Memb. Sci.* **374**, 1–11 (2011).
  40. Greenstein, K. E., Myung, N. V., Parkin, G. F. & Cwiertny, D. M. Performance comparison of hematite (A-Fe<sub>2</sub>O<sub>3</sub>)-polymer composite and core-shell nanofibers as point-of-use filtration platforms for metal sequestration. *Water Res.* **148**, 492–503 (2019).
  41. Peter, K. T., Johns, A. J., Myung, N. V. & Cwiertny, D. M. Functionalized polymer-iron oxide hybrid nanofibers: Electrospun filtration devices for metal oxyanion removal. *Water Res.* **117**, 207–217 (2017).
  42. Peter, Katherine T.; Myung, Nosang V.; Cwiertny, D. M. Surfactant-assisted fabrication of porous polymeric nanofibers with surface-enriched iron oxide nanoparticles: composite filtration materials for removal of metal cations. *Environ. Sci. Nano* **5**, 669–681 (2018).
  43. Zhang, X. *et al.* Preparation, performance and adsorption activity of TiO<sub>2</sub> nanoparticles entrapped PVDF hybrid membranes. *Appl. Surf. Sci.* **263**, 660–665 (2012).
  44. Liang, P., Qin, Y., Hu, B., Peng, T. & Jiang, Z. Nanometer-size titanium dioxide microcolumn on-line preconcentration of trace metals and their determination by inductively coupled plasma atomic emission spectrometry in water. *Anal. Chim. Acta* **440**, 207–213 (2001).
  45. Gohari, B. & Abu-zahra, N. Polyethersulfone Membranes Prepared with 3 - Aminopropyltriethoxysilane Modified Alumina Nanoparticles for Cu ( II ) Removal from

- Water. *ACS OMEGA* **3**, 10154–10162 (2018).
46. Zhang, X. *et al.* Preparation, performances of PVDF/ZnO hybrid membranes and their applications in the removal of copper ions. *Appl. Surf. Sci.* **316**, 333–340 (2014).
  47. Zhang, Y., Bian, T., Gu, J., Zheng, X. & Li, Z. Controllable ZnO architectures with the assistance of ethanolamine and their application for removing divalent heavy metals (Cu, Pb, Ni) from water. *New J. Chem.* **42**, 3356–3362 (2018).
  48. Chen, L. *et al.* In situ formation of La (OH)<sub>3</sub>-poly (vinylidene fluoride) composite filtration membrane with superior phosphate removal properties. *Chem. Eng. J.* **347**, 695–702 (2018).
